# Supplementary material for: A data-driven method for optimization of classical interatomic potentials
Source: Springer Nature journal article supplement (doi:10.1557/s43580-024-00802-7), 2024-03-08
Supplement: 43580_2024_802_MOESM1_ESM.pdf [file 43580_2024_802_MOESM1_ESM.pdf]

Supplementary Information for “A Data-Driven Method  
for Optimization of Classical Interatomic Potentials”

Benjamin A. Jasperson, Harley T. Johnson

| Given parameters | Description                                                                                                                         | Ni Ref | Ni OptNN |
|------------------|-------------------------------------------------------------------------------------------------------------------------------------|--------|----------|
| elt              | text string, element name                                                                                                           | Ni     | Ni       |
| lat              | text string, lattice structure (reference configuration)                                                                            | FCC    | FCC      |
| z                | number of nearest neighbors in reference structure                                                                                  | 12     | 12       |
| ielement         | atomic number                                                                                                                       | 0      | 4.46E-07 |
| atwt             | atomic weight                                                                                                                       | 58.69  | 58.69    |
| alat             | lattice constant of reference structure                                                                                             | 3.52   | 3.52     |
| ibar             | selects the form of the function ‘G(Gamma)’ used to compute the electron density; will be selected/provided prior to fitting optNN. | 3      | 3        |
| rho              | relative density of element                                                                                                         | 1      | 1        |
| re               | equilibrium distance between atoms in reference structure                                                                           | 2.49   | 2.49     |
| zbl              | blend the MEAM I-J pair potential with the ZBL potential for small atom separations (ZBL) (default = 1)                             | 0.00   | 0.00     |

Table 1: Given parameters for OptNN

## 1 MEAM Parameters

Parameter descriptions given are from the readme file for [1].

### 1.1 Given parameters

Table 1 shows the given parameters for the optimization problem demonstration.

### 1.2 Fitted parameters

Table 2 shows the fitted parameters determined as a result of the optimization problem demonstration.

## 2 Models used

The models used in this work to train PredNN were originally published and also archived in OpenKIM through the following references: [1]–[117]

| Fitted parameters | Description                                                                                                                                                                              | Ni Ref | Ni OptNN | notes                                 |
|-------------------|------------------------------------------------------------------------------------------------------------------------------------------------------------------------------------------|--------|----------|---------------------------------------|
| alpha             | alpha parameter for pair potential between I and J<br>(can be computed from bulk modulus of reference structure                                                                          | 5.08   | 5.03     |                                       |
| b0                | standard beta parameters                                                                                                                                                                 | 2.56   | 3.52     |                                       |
| b1                |                                                                                                                                                                                          | 1.5    | 0.29     |                                       |
| b2                |                                                                                                                                                                                          | 6      | 4.57     |                                       |
| b3                |                                                                                                                                                                                          | 1.5    | 1.48     |                                       |
| esub              | (energy per atom in ref structure at equilibrium)                                                                                                                                        | 4.45   | 3.89     |                                       |
| asub              | (A parameter for meam, see pg 6090 of baskes)                                                                                                                                            | 0.94   | 0.94     |                                       |
| t1                | standard meam parameters                                                                                                                                                                 | 3.1    | 2.54     |                                       |
| t2                |                                                                                                                                                                                          | 1.8    | 0.64     |                                       |
| t3                |                                                                                                                                                                                          | 4.36   | 4.20     |                                       |
| rozero            | element-dependent density scaling that weights<br>the reference background density<br>(see, e.g., equation 4.5 in [[9](#references)]) and<br>Is typically 1.0 for single-element systems | 1      | 0.90     |                                       |
| rc                | cutoff radius for cutoff function. (default = 4.0)                                                                                                                                       | 4.8    | 4.50     |                                       |
| delr              | length of smoothing distance for cutoff function. (default = 0.1)                                                                                                                        | 0.1    | 0.14     |                                       |
| attrac            | additional cubic attraction term in Rose energy I-J pair potential<br>(default = 0)                                                                                                      | 0.05   | -0.02    |                                       |
| repuls            | additional cubic repulsive term in Rose energy I-J pair potential<br>(default = 0)                                                                                                       | 0.05   | 0.07     |                                       |
| Cmin              | Cmin screening parameter when I-J pair is screened by K ( $I \leq J$ );<br>Default = 2.0                                                                                                 | 0.81   | 0.71     |                                       |
| Cmax              | Cmax screening parameter when I-J pair is screened by K ( $I <= J$ );<br>Default = 2.8                                                                                                   | 2.8    | 2.76     |                                       |
| Ec                | cohesive energy of reference structure for I-J mixture                                                                                                                                   | 4.45   | 4.49     |                                       |
| emb_lin_neg       | integer to set embedding function (default = 0)                                                                                                                                          | 0      | 0.08     | OptNN value<br>Rounded to nearest int |
| bkgd_dyn          | integer value to select background density formula (default = 0)                                                                                                                         | 0      | 0.23     | OptNN value<br>rounded to nearest int |

Table 2: Fitted parameters values from OptNN

## References

- [1] Y. Afshar, S. Hütter, R. Rudd, *et al.*, *The modified embedded atom method (MEAM) potential v002*, in collab. with Y. Afshar and OpenKIM, 2023. DOI: [10.25950/EE5EBA52](https://doi.org/10.25950/EE5EBA52). [Online]. Available: [https://openkim.org/cite/MD\\_249792265679\\_002](https://openkim.org/cite/MD_249792265679_002) (visited on 12/10/2023).
- [2] A. Agrawal and R. Mirzaeifar, “Copper-graphene composites; developing the MEAM potential and investigating their mechanical properties,” *Computational Materials Science*, vol. 188, p. 110 204, 2021. DOI: [10.1016/j.commatsci.2020.110204](https://doi.org/10.1016/j.commatsci.2020.110204).
- [3] A. Agrawal and R. Mirzaeifar, *MEAM potential for cu-c composites developed by agrawal and mirzaeifar (2021) v002*, 2023. DOI: [10.25950/fecec5f6](https://doi.org/10.25950/fecec5f6). [Online]. Available: <https://doi.org/10.25950/fecec5f6>.
- [4] G. Almyras, D. Sangiovanni, and K. Sarakinos, *MEAM potential for the n-al-ti system developed by almyras et al. v002*, 2023. DOI: [10.25950/d492eba7](https://doi.org/10.25950/d492eba7). [Online]. Available: <https://doi.org/10.25950/d492eba7>.
- [5] G. A. Almyras, D. G. Sangiovanni, and K. Sarakinos, “Semi-empirical force-field model for the  $\text{ti}_{1-x}\text{Al}_x\text{N}$  ( $0 \leq x \leq 1$ ) system,” *Materials*, vol. 12, no. 2, 2019. DOI: [10.3390/ma12020215](https://doi.org/10.3390/ma12020215).
- [6] E. Asadi, M. A. Zaeem, S. Nouranian, and M. I. Baskes, *MEAM potential for cu developed by asadi et al. (2015) v002*, 2023. DOI: [10.25950/d439eda9](https://doi.org/10.25950/d439eda9). [Online]. Available: <https://doi.org/10.25950/d439eda9>.
- [7] E. Asadi, M. A. Zaeem, S. Nouranian, and M. I. Baskes, *MEAM potential for ni developed by asadi et al. (2015) v002*, 2023. DOI: [10.25950/822526fc](https://doi.org/10.25950/822526fc). [Online]. Available: <https://doi.org/10.25950/822526fc>.
- [8] E. Asadi, M. A. Zaeem, S. Nouranian, and M. I. Baskes, “Two-phase solid–liquid coexistence of ni, cu, and al by molecular dynamics simulations using the modified embedded-atom method,” *Acta Materialia*, vol. 86, pp. 169–181, 2015. DOI: [10.1016/j.actamat.2014.12.010](https://doi.org/10.1016/j.actamat.2014.12.010).
- [9] W.-M. Choi, Y. H. Jo, S. Sohn, S. Lee, and B.-J. Lee, *MEAM potential for the co-ni-cr-fe-mn system developed by choi et al., (2018) v002*, 2023. DOI: [10.25950/c97d2cd7](https://doi.org/10.25950/c97d2cd7). [Online]. Available: <https://doi.org/10.25950/c97d2cd7>.
- [10] W.-M. Choi, Y. Kim, D. Seol, and B.-J. Lee, *MEAM potential for the ni-mn system developed by choi et al. (2017) v002*, 2023. DOI: [10.25950/9f66663c](https://doi.org/10.25950/9f66663c). [Online]. Available: <https://doi.org/10.25950/9f66663c>.
- [11] W.-M. Choi, Y. Kim, D. Seol, and B.-J. Lee, “Modified embedded-atom method interatomic potentials for the co-cr, co-fe, co-mn, cr-mn and mn-ni binary systems,” *Computational Materials Science*, vol. 130, pp. 121–129, 2017, Publisher: Elsevier. DOI: [10.1016/j.commatsci.2017.01.002](https://doi.org/10.1016/j.commatsci.2017.01.002).
- [12] W.-M. Choi, Y. H. Jo, S. S. Sohn, S. Lee, and B.-J. Lee, “Understanding the physical metallurgy of the CoCrFeMnNi high-entropy alloy: An atomistic simulation study,” *npj Computational Materials*, vol. 4, p. 1, 2018, Publisher: Nature Publishing Group. DOI: [10.1038/s41524-017-0060-9](https://doi.org/10.1038/s41524-017-0060-9).

- [13] A. Costa E Silva, J. Ågren, M. T. Clavaguera-Mora, *et al.*, “Applications of computational thermodynamics — the extension from phase equilibrium to phase transformations and other properties,” *Calphad*, vol. 31, no. 1, pp. 53–74, Mar. 2007, ISSN: 03645916. DOI: [10.1016/j.calphad.2006.02.006](https://doi.org/10.1016/j.calphad.2006.02.006). [Online]. Available: <https://linkinghub.elsevier.com/retrieve/pii/S0364591606000149> (visited on 12/14/2023).
- [14] A. Costa e Silva, J. Agren, M. T. Clavaguera-Mora, *et al.*, *MEAM potential for the al-ni system developed by silva et al. (2007) v002*, in collab. with S.-H. Oh and OpenKIM, 2023. DOI: [10.25950/845958E4](https://doi.org/10.25950/845958E4). [Online]. Available: [https://openkim.org/cite/MO\\_131642768288\\_002](https://openkim.org/cite/MO_131642768288_002) (visited on 12/14/2023).
- [15] W.-P. Dong, H.-K. Kim, W.-S. Ko, B.-M. Lee, and B.-J. Lee, “Atomistic modeling of pure co and co–al system,” *CALPHAD ; computer coupling of phase diagrams and thermochemistry*, vol. 38, pp. 7–16, 2012, Publisher: Elsevier. DOI: [10.1016/j.calphad.2012.04.001](https://doi.org/10.1016/j.calphad.2012.04.001).
- [16] W.-P. Dong, H.-K. Kim, W.-S. Ko, B.-M. Lee, and B.-J. Lee, *MEAM potential for the co-al system developed by dong et al. (2012) v002*, 2023. DOI: [10.25950/5b46e82b](https://doi.org/10.25950/5b46e82b). [Online]. Available: <https://doi.org/10.25950/5b46e82b>.
- [17] R. S. Elliott and E. B. Tadmor, *Knowledgebase of interatomic models (KIM) application programming interface (API)*. DOI: [10.25950/FF8F563A](https://doi.org/10.25950/FF8F563A). [Online]. Available: <https://openkim.org/kim-api> (visited on 12/05/2023).
- [18] S.-A. Etesami and E. Asadi, *MEAM potential for cu developed by etesami and asadi (2018) v002*, 2023. DOI: [10.25950/5e2b95f8](https://doi.org/10.25950/5e2b95f8). [Online]. Available: <https://doi.org/10.25950/5e2b95f8>.
- [19] S.-A. Etesami and E. Asadi, *MEAM potential for ni developed by etesami and asadi (2018) v002*, 2023. DOI: [10.25950/dd49a2cc](https://doi.org/10.25950/dd49a2cc). [Online]. Available: <https://doi.org/10.25950/dd49a2cc>.
- [20] S.-A. Etesami, M. I. Baskes, M. Laradji, and E. Asadi, *MEAM potential for pb-sn developed by etesami et al. (2018) v002*, 2023. DOI: [10.25950/e69387c4](https://doi.org/10.25950/e69387c4). [Online]. Available: <https://doi.org/10.25950/e69387c4>.
- [21] S. A. Etesami and E. Asadi, “Molecular dynamics for near melting temperatures simulations of metals using modified embedded-atom method,” *Journal of Physics and Chemistry of Solids*, vol. 112, pp. 61–72, 2018. DOI: [10.1016/j.jpcs.2017.09.001](https://doi.org/10.1016/j.jpcs.2017.09.001).
- [22] S. A. Etesami, M. I. Baskes, M. Laradji, and E. Asadi, “Thermodynamics of solid sn and PbSn liquid mixtures using molecular dynamics simulations,” *Acta Materialia*, vol. 161, pp. 320–330, 2018. DOI: [10.1016/j.actamat.2018.09.036](https://doi.org/10.1016/j.actamat.2018.09.036).
- [23] H. Gao, A. Otero-de-la-Roza, S. M. Aouadi, E. R. Johnson, and A. Martini, “An empirical model for silver tantalate,” *Modelling and Simulation in Materials Science and Engineering*, vol. 21, no. 5, p. 055 002, May 2013. DOI: [10.1088/0965-0393/21/5/055002](https://doi.org/10.1088/0965-0393/21/5/055002).
- [24] H. Gao, A. O. de la Roza, S. Aouadi, E. R. Johnson, and A. Martini, *MEAM potential for perovskite silver tantalate (AgTaO3) developed by gao et al. (2013) v002*, 2023. DOI: [10.25950/accd9565](https://doi.org/10.25950/accd9565). [Online]. Available: <https://doi.org/10.25950/accd9565>.

- [25] H.-S. Jang, D. Seol, and B.-J. Lee, *MEAM potential for the ca-zn-mg system developed by jang, seol and lee (2019) v002*, 2023. DOI: [10.25950/df3b7525](https://doi.org/10.25950/df3b7525). [Online]. Available: <https://doi.org/10.25950/df3b7525>.
- [26] H.-S. Jang, D. Seol, and B.-J. Lee, “Modified embedded-atom method interatomic potential for the mg–zn–ca ternary system,” *CALPHAD ; computer coupling of phase diagrams and thermochemistry*, vol. 67, p. 101 674, 2019. DOI: [10.1016/j.calphad.2019.101674](https://doi.org/10.1016/j.calphad.2019.101674).
- [27] B. Jelinek, S. Groh, M. F. Horstemeyer, *et al.*, *MEAM potential for al-si-mg-cu-fe alloys developed by jelinek et al. (2012) v002*, 2023. DOI: [10.25950/8d75422b](https://doi.org/10.25950/8d75422b). [Online]. Available: <https://doi.org/10.25950/8d75422b>.
- [28] B. Jelinek, S. Groh, M. F. Horstemeyer, *et al.*, “Modified embedded atom method potential for al, si, mg, cu, and fe alloys,” *Physical Review B*, vol. 85, p. 245 102, Jun. 2012. DOI: [10.1103/PhysRevB.85.245102](https://doi.org/10.1103/PhysRevB.85.245102).
- [29] G.-U. Jeong and B.-J. Lee, “Interatomic potentials for pt-c and pd-c systems and a study of structure-adsorption relationship in large pt/graphene system,” *Computational Materials Science*, vol. 185, p. 109 946, 2020. DOI: [10.1016/j.commatsci.2020.109946](https://doi.org/10.1016/j.commatsci.2020.109946).
- [30] G.-U. Jeong, C. S. Park, H.-S. Do, S.-M. Park, and S. Lee, *MEAM potential for the pd-al system developed by jeong et al. (2018) v002*, 2023. DOI: [10.25950/ca88ee24](https://doi.org/10.25950/ca88ee24). [Online]. Available: <https://doi.org/10.25950/ca88ee24>.
- [31] G.-U. Jeong and B.-J. Lee, *MEAM potential for the pd-c system developed by jeong, and lee (2020) v002*, 2023. DOI: [10.25950/5a6fe4c2](https://doi.org/10.25950/5a6fe4c2). [Online]. Available: <https://doi.org/10.25950/5a6fe4c2>.
- [32] G.-U. Jeong, C. S. Park, H.-S. Do, S.-M. Park, and B.-J. Lee, *MEAM potential for the pd-co system developed by jeong et al. (2018) v002*, 2023. DOI: [10.25950/8aeb9ed](https://doi.org/10.25950/8aeb9ed). [Online]. Available: <https://doi.org/10.25950/8aeb9ed>.
- [33] G.-U. Jeong, C. S. Park, H.-S. Do, S.-M. Park, and B.-J. Lee, *MEAM potential for the pd-cu system developed by jeong et al. (2018) v002*, 2023. DOI: [10.25950/c6a7f472](https://doi.org/10.25950/c6a7f472). [Online]. Available: <https://doi.org/10.25950/c6a7f472>.
- [34] G.-U. Jeong, C. S. Park, H.-S. Do, S.-M. Park, and B.-J. Lee, *MEAM potential for the pd-fe system developed by jeong et al. (2018) v002*, 2023. DOI: [10.25950/3239a8b4](https://doi.org/10.25950/3239a8b4). [Online]. Available: <https://doi.org/10.25950/3239a8b4>.
- [35] G.-U. Jeong, C. S. Park, H.-S. Do, S.-M. Park, and B.-J. Lee, *MEAM potential for the pd-mo system developed by jeong et al. (2018) v002*, 2023. DOI: [10.25950/79959f64](https://doi.org/10.25950/79959f64). [Online]. Available: <https://doi.org/10.25950/79959f64>.
- [36] G.-U. Jeong, C. S. Park, H.-S. Do, S.-M. Park, and B.-J. Lee, *MEAM potential for the pd-ni system developed by jeong et al. (2018) v002*, 2023. DOI: [10.25950/aaefbb2e](https://doi.org/10.25950/aaefbb2e). [Online]. Available: <https://doi.org/10.25950/aaefbb2e>.
- [37] G.-U. Jeong, C. S. Park, H.-S. Do, S.-M. Park, and B.-J. Lee, *MEAM potential for the pd-ti system developed by jeong et al. (2018) v002*, 2023. DOI: [10.25950/6eaf2bc](https://doi.org/10.25950/6eaf2bc). [Online]. Available: <https://doi.org/10.25950/6eaf2bc>.

- [38] G.-U. Jeong and B.-J. Lee, *MEAM potential for the pt-c system developed by jeong, and lee (2020) v002*, 2023. DOI: [10.25950/c2c5a582](https://doi.org/10.25950/c2c5a582). [Online]. Available: <https://doi.org/10.25950/c2c5a582>.
- [39] G.-U. Jeong, C. S. Park, H.-S. Do, S.-M. Park, and B.-J. Lee, “Second nearest-neighbor modified embedded-atom method interatomic potentials for the pd-m (m= al, co, cu, fe, mo, ni, ti) binary systems,” *CALPHAD ; computer coupling of phase diagrams and thermochemistry*, vol. 62, pp. 172–186, 2018, Publisher: Elsevier. DOI: [10.1016/j.calphad.2018.06.006](https://doi.org/10.1016/j.calphad.2018.06.006).
- [40] K.-H. Kang, I. Sa, J.-C. Lee, E. Fleury, and B.-J. Lee, “Atomistic modeling of the cu–zr–ag bulk metallic glass system,” *Scripta Materialia*, vol. 61, no. 8, pp. 801–804, 2009, Publisher: Elsevier. DOI: [10.1016/j.scriptamat.2009.07.002](https://doi.org/10.1016/j.scriptamat.2009.07.002).
- [41] K.-H. Kang, I. Sa, J.-C. Lee, E. Fleury, and B.-J. Lee, *MEAM potential for the zr-ag-cu system developed by kang et al. (2009) v002*, 2023. DOI: [10.25950/b43c8959](https://doi.org/10.25950/b43c8959). [Online]. Available: <https://doi.org/10.25950/b43c8959>.
- [42] S. Kavousi, B. R. Novak, M. I. Baskes, M. A. Zaeem, and D. Moldovan, *MEAM potential for ni-ti alloys developed by kavousi et al, (2019) v002*, 2023. DOI: [10.25950/a46c3ac7](https://doi.org/10.25950/a46c3ac7). [Online]. Available: <https://doi.org/10.25950/a46c3ac7>.
- [43] S. Kavousi, B. R. Novak, M. I. Baskes, M. A. Zaeem, and D. Moldovan, “Modified embedded-atom method potential for high-temperature crystal-melt properties of ti–ni alloys and its application to phase field simulation of solidification,” *Modelling and Simulation in Materials Science and Engineering*, vol. 28, no. 1, p. 015 006, Jan. 1, 2020, ISSN: 0965-0393, 1361-651X. DOI: [10.1088/1361-651X/ab580c](https://doi.org/10.1088/1361-651X/ab580c). [Online]. Available: <https://iopscience.iop.org/article/10.1088/1361-651X/ab580c> (visited on 12/12/2023).
- [44] Y.-M. Kim, N. J. Kim, and B.-J. Lee, “Atomistic modeling of pure mg and mg–al systems,” *CALPHAD ; computer coupling of phase diagrams and thermochemistry*, vol. 33, no. 4, pp. 650–657, 2009, Publisher: Elsevier. DOI: [10.1016/j.calphad.2009.07.004](https://doi.org/10.1016/j.calphad.2009.07.004).
- [45] Y.-K. Kim, H.-K. Kim, W.-S. Jung, and B.-J. Lee, “Atomistic modeling of the ti–al binary system,” *Computational materials science*, vol. 119, pp. 1–8, 2016, Publisher: Elsevier. DOI: [10.1016/j.commatsci.2016.03.038](https://doi.org/10.1016/j.commatsci.2016.03.038).
- [46] Y.-K. Kim, H.-K. Kim, W.-S. Jung, and B.-J. Lee, “Development and application of ni-ti and ni-al-ti 2nn-MEAM interatomic potentials for ni-base superalloys,” *Computational Materials Science*, vol. 139, pp. 225–233, 2017, Publisher: Elsevier. DOI: [10.1016/j.commatsci.2017.08.002](https://doi.org/10.1016/j.commatsci.2017.08.002).
- [47] Y.-M. Kim, N. J. Kim, and B.-J. Lee, *MEAM potential for the al-mg system developed by kim, kim, and lee (2009) v002*, 2023. DOI: [10.25950/525e9efc](https://doi.org/10.25950/525e9efc). [Online]. Available: <https://doi.org/10.25950/525e9efc>.
- [48] Y.-K. Kim, H.-K. Kim, W.-S. Jung, and B.-J. Lee, *MEAM potential for the al-ti system developed by kim et al. (2016) v002*, 2023. DOI: [10.25950/522a8fbb](https://doi.org/10.25950/522a8fbb). [Online]. Available: <https://doi.org/10.25950/522a8fbb>.

- [49] Y.-M. Kim and B.-J. Lee, *MEAM potential for the cu-zr system developed by kim and lee (2008) v001*, 2023. DOI: [10.25950/3697272c](https://doi.org/10.25950/3697272c). [Online]. Available: <https://doi.org/10.25950/3697272c>.
- [50] K.-H. Kim, J. B. Jeon, and B.-J. Lee, *MEAM potential for the mg-ca system developed by kim, jeon and lee (2015) v002*, 2023. DOI: [10.25950/7f588c66](https://doi.org/10.25950/7f588c66). [Online]. Available: <https://doi.org/10.25950/7f588c66>.
- [51] K.-H. Kim and B.-J. Lee, *MEAM potential for the mg-pb system developed by kim and lee (2017) v002*, 2023. DOI: [10.25950/77b8fbf5](https://doi.org/10.25950/77b8fbf5). [Online]. Available: <https://doi.org/10.25950/77b8fbf5>.
- [52] Y.-K. Kim, W.-S. Jung, and B.-J. Lee, *MEAM potential for the ni-al-co system developed by kim, jung, and lee, (2015) v002*, 2023. DOI: [10.25950/bf52f2c4](https://doi.org/10.25950/bf52f2c4). [Online]. Available: <https://doi.org/10.25950/bf52f2c4>.
- [53] Y.-K. Kim, H.-K. Kim, W.-S. Jung, and B.-J. Lee, *MEAM potential for the ni-al-ti system developed by kim et al. (2017) v002*, 2023. DOI: [10.25950/6bc8efba](https://doi.org/10.25950/6bc8efba). [Online]. Available: <https://doi.org/10.25950/6bc8efba>.
- [54] J.-S. Kim, D. Seol, J. Ji, H.-S. Jang, and B.-J. Lee, *MEAM potential for the pt-al system developed by kim and lee (2017) v002*, 2023. DOI: [10.25950/2dbac54f](https://doi.org/10.25950/2dbac54f). [Online]. Available: <https://doi.org/10.25950/2dbac54f>.
- [55] J.-S. Kim, D. Seol, J. Ji, H.-S. Jang, and B.-J. Lee, *MEAM potential for the pt-co system developed by kim and lee (2017) v002*, 2023. DOI: [10.25950/ba635776](https://doi.org/10.25950/ba635776). [Online]. Available: <https://doi.org/10.25950/ba635776>.
- [56] J.-S. Kim, D. Seol, J. Ji, H.-S. Jang, and B.-J. Lee, *MEAM potential for the pt-cu system developed by kim and lee (2017) v002*, 2023. DOI: [10.25950/4bfadeb5](https://doi.org/10.25950/4bfadeb5). [Online]. Available: <https://doi.org/10.25950/4bfadeb5>.
- [57] J. Kim and B.-J. Lee, *MEAM potential for the pt-fe system developed by kim, koo, and lee (2006) v002*, 2023. DOI: [10.25950/86e43fbf](https://doi.org/10.25950/86e43fbf). [Online]. Available: <https://doi.org/10.25950/86e43fbf>.
- [58] J.-S. Kim, D. Seol, J. Ji, H.-S. Jang, and B.-J. Lee, *MEAM potential for the pt-ni system developed by kim and lee (2017) v002*, 2023. DOI: [10.25950/76b7234f](https://doi.org/10.25950/76b7234f). [Online]. Available: <https://doi.org/10.25950/76b7234f>.
- [59] J.-S. Kim, D. Seol, J. Ji, H.-S. Jang, and B.-J. Lee, *MEAM potential for the pt-ti system developed by kim and lee (2017) v002*, 2023. DOI: [10.25950/72cee4d7](https://doi.org/10.25950/72cee4d7). [Online]. Available: <https://doi.org/10.25950/72cee4d7>.
- [60] J.-S. Kim, D. Seol, J. Ji, H.-S. Jang, and B.-J. Lee, *MEAM potential for the pt-v system developed by kim and lee (2017) v002*, 2023. DOI: [10.25950/463877c3](https://doi.org/10.25950/463877c3). [Online]. Available: <https://doi.org/10.25950/463877c3>.
- [61] J. Kim, Y. Koo, and B.-J. Lee, “Modified embedded-atom method interatomic potential for the fe–pt alloy system,” *Journal of materials research*, vol. 21, no. 1, pp. 199–208, 2006, Publisher: Cambridge University Press. DOI: [10.1557/JMR.2006.0008](https://doi.org/10.1557/JMR.2006.0008).



- [62] Y.-M. Kim and B.-J. Lee, “A modified embedded-atom method interatomic potential for the cu–zr system,” *Journal of Materials Research*, vol. 23, no. 4, pp. 1095–1104, Apr. 1, 2008, ISSN: 2044-5326. DOI: [10.1557/jmr.2008.0130](https://doi.org/10.1557/jmr.2008.0130). [Online]. Available: <https://doi.org/10.1557/jmr.2008.0130>.
- [63] K.-H. Kim, J. B. Jeon, and B.-J. Lee, “Modified embedded-atom method interatomic potentials for mg–x (x= y, sn, ca) binary systems,” *CALPHAD ; computer coupling of phase diagrams and thermochemistry*, vol. 48, pp. 27–34, 2015, Publisher: Elsevier. DOI: [10.1016/j.calphad.2014.10.001](https://doi.org/10.1016/j.calphad.2014.10.001).
- [64] Y.-K. Kim, W.-S. Jung, and B.-J. Lee, “Modified embedded-atom method interatomic potentials for the ni–co binary and the ni–al–co ternary systems,” *Modelling and Simulation in Materials Science and Engineering*, vol. 23, no. 5, p. 055 004, 2015, Publisher: IOP Publishing. DOI: [10.1088/0965-0393/23/5/055004](https://doi.org/10.1088/0965-0393/23/5/055004).
- [65] K.-H. Kim and B.-J. Lee, “Modified embedded-atom method interatomic potentials for mg–nd and mg–pb binary systems,” *CALPHAD ; computer coupling of phase diagrams and thermochemistry*, vol. 57, pp. 55–61, 2017, Publisher: Elsevier. DOI: [10.1016/j.calphad.2017.03.003](https://doi.org/10.1016/j.calphad.2017.03.003).
- [66] J.-S. Kim, D. Seol, J. Ji, H.-S. Jang, Y. Kim, and B.-J. Lee, “Second nearest-neighbor modified embedded-atom method interatomic potentials for the pt–m (m= al, co, cu, mo, ni, ti, v) binary systems,” *CALPHAD ; computer coupling of phase diagrams and thermochemistry*, vol. 59, pp. 131–141, 2017, Publisher: Elsevier. DOI: [10.1016/j.calphad.2017.09.005](https://doi.org/10.1016/j.calphad.2017.09.005).
- [67] W.-S. Ko, J.-H. Shim, and B.-J. Lee, “Atomistic modeling of the al–h and ni–h systems,” *Journal of Materials Research*, vol. 26, no. 12, pp. 1552–1560, 2011, Publisher: Cambridge University Press. DOI: [10.1557/jmr.2011.95](https://doi.org/10.1557/jmr.2011.95).
- [68] W.-S. Ko, B. Grabowski, and J. ö. Neugebauer, “Development and application of a ni–ti interatomic potential with high predictive accuracy of the martensitic phase transition,” *Physical Review B*, vol. 92, p. 134 107, Oct. 2015. DOI: [10.1103/PhysRevB.92.134107](https://doi.org/10.1103/PhysRevB.92.134107).
- [69] W.-S. Ko, J.-H. Shim, and B.-J. Lee, *MEAM potential for the al–h system developed by ko, shim, and lee (2011) v002*, 2023. DOI: [10.25950/598e7d79](https://doi.org/10.25950/598e7d79). [Online]. Available: <https://doi.org/10.25950/598e7d79>.
- [70] W.-S. Ko, J.-H. Shim, and B.-J. Lee, *MEAM potential for the ni–h system developed by ko et al. (2011) v002*, 2023. DOI: [10.25950/36f63a5c](https://doi.org/10.25950/36f63a5c). [Online]. Available: <https://doi.org/10.25950/36f63a5c>.
- [71] W.-S. Ko, B. Grabowski, and J. Neugebauer, *MEAM potential for ni–ti developed by ko, grabowski, and neugebauer (2015) v002*, 2023. DOI: [10.25950/48f55722](https://doi.org/10.25950/48f55722). [Online]. Available: <https://doi.org/10.25950/48f55722>.
- [72] W.-S. Ko and B.-J. Lee, *MEAM potential for the v–pd–y system developed by ko and lee (2013) v002*, 2023. DOI: [10.25950/2433fee7](https://doi.org/10.25950/2433fee7). [Online]. Available: <https://doi.org/10.25950/2433fee7>.

- [73] W.-S. Ko and B.-J. Lee, “Modified embedded-atom method interatomic potentials for pure y and the v–pd–y ternary system,” *Modelling and Simulation in Materials Science and Engineering*, vol. 21, no. 8, p. 085 008, 2013, Publisher: IOP Publishiwng. DOI: [10.1088/0965-0393/21/8/085008](https://doi.org/10.1088/0965-0393/21/8/085008).
- [74] B.-J. Lee, J.-H. Shim, and M. I. Baskes, *MEAM potential for ag developed by lee, shim, and baskes (2003) v001*, 2023. DOI: [10.25950/e82b8b74](https://doi.org/10.25950/e82b8b74). [Online]. Available: <https://doi.org/10.25950/e82b8b74>.
- [75] B.-J. Lee, J.-H. Shim, and M. I. Baskes, *MEAM potential for au developed by lee, shim, and baskes (2003) v001*, 2023. DOI: [10.25950/28955e52](https://doi.org/10.25950/28955e52). [Online]. Available: <https://doi.org/10.25950/28955e52>.
- [76] B.-J. Lee, J.-H. Shim, and M. I. Baskes, *MEAM potential for cu developed by lee, shim, and baskes (2003) v001*, 2023. DOI: [10.25950/e46a3663](https://doi.org/10.25950/e46a3663). [Online]. Available: <https://doi.org/10.25950/e46a3663>.
- [77] B.-J. Lee, J.-H. Shim, and M. I. Baskes, *MEAM potential for al developed by lee, shim, and baskes (2003) v001*, 2023. DOI: [10.25950/5a4ff238](https://doi.org/10.25950/5a4ff238). [Online]. Available: <https://doi.org/10.25950/5a4ff238>.
- [78] E. Lee and B.-J. Lee, *MEAM potential for the fe-al system developed by lee, and lee. (2010) v002*, 2023. DOI: [10.25950/5eebb923](https://doi.org/10.25950/5eebb923). [Online]. Available: <https://doi.org/10.25950/5eebb923>.
- [79] B.-J. Lee, B. D. Wirth, J.-H. Shim, J. Kwon, S. C. Kwon, and J.-H. Hong, *MEAM potential for the fe-cu system developed by lee et al. (2005) v002*, 2023. DOI: [10.25950/3a47c45a](https://doi.org/10.25950/3a47c45a). [Online]. Available: <https://doi.org/10.25950/3a47c45a>.
- [80] B.-J. Lee and J.-H. Shim, *MEAM potential for the ni-cu system developed by lee and shim (2004) v002*, 2023. DOI: [10.25950/2a6ef3ab](https://doi.org/10.25950/2a6ef3ab). [Online]. Available: <https://doi.org/10.25950/2a6ef3ab>.
- [81] B.-J. Lee, J.-H. Shim, and M. I. Baskes, *MEAM potential for pb developed by lee, shim, and baskes (2003) v001*, 2023. DOI: [10.25950/8c4bb92d](https://doi.org/10.25950/8c4bb92d). [Online]. Available: <https://doi.org/10.25950/8c4bb92d>.
- [82] B.-J. Lee, J.-H. Shim, and M. I. Baskes, *MEAM potential for pd developed by lee, shim, and baskes (2003) v001*, 2023. DOI: [10.25950/ef899ded](https://doi.org/10.25950/ef899ded). [Online]. Available: <https://doi.org/10.25950/ef899ded>.
- [83] B.-J. Lee, J.-H. Shim, and M. I. Baskes, *MEAM potential for pt developed by lee, shim, and baskes (2003) v001*, 2023. DOI: [10.25950/798d49d8](https://doi.org/10.25950/798d49d8). [Online]. Available: <https://doi.org/10.25950/798d49d8>.
- [84] B.-J. Lee and J.-H. Shim, “A modified embedded atom method interatomic potential for the cu–ni system,” *CALPHAD ; computer coupling of phase diagrams and thermochemistry*, vol. 28, no. 2, pp. 125–132, 2004, Publisher: Elsevier. DOI: [10.1016/j.calphad.2004.06.001](https://doi.org/10.1016/j.calphad.2004.06.001).
- [85] B.-J. Lee, B. D. Wirth, J.-H. Shim, J. Kwon, S. C. Kwon, and J.-H. Hong, “Modified embedded-atom method interatomic potential for the fe- cu alloy system and cascade simulations on pure fe and fe- cu alloys,” *Physical Review B*, vol. 71, no. 18, p. 184 205, 2005, Publisher: APS. DOI: [10.1103/PhysRevB.71.184205](https://doi.org/10.1103/PhysRevB.71.184205).

- [86] E. Lee and B.-J. Lee, “Modified embedded-atom method interatomic potential for the fe–al system,” *Journal of Physics: Condensed Matter*, vol. 22, no. 17, p. 175 702, 2010, Publisher: IOP Publishing. DOI: [10.1088/0953-8984/22/17/175702](https://doi.org/10.1088/0953-8984/22/17/175702).
- [87] B.-J. Lee, J.-H. Shim, and M. I. Baskes, “Semiempirical atomic potentials for the fcc metals <span class="nocase">cu, ag, au, ni, pd, pt, al, and pb</span> based on first and second nearest-neighbor modified embedded atom method,” *Physical Review B*, vol. 68, no. 14, p. 144 112, Oct. 2003, Number of pages: 11 Publisher: American Physical Society. DOI: [10.1103/PhysRevB.68.144112](https://doi.org/10.1103/PhysRevB.68.144112). [Online]. Available: <https://link.aps.org/doi/10.1103/PhysRevB.68.144112>.
- [88] A. Mahata, T. Mukhopadhyay, and M. A. Zaeem, *MEAM potential for the al-ni system developed by mahata, mukhopadhyay and asle zaeem (2022) v001*, 2023. DOI: [10.25950/5d4f85ba](https://doi.org/10.25950/5d4f85ba). [Online]. Available: <https://doi.org/10.25950/5d4f85ba>.
- [89] A. Mahata, T. Mukhopadhyay, and M. Asle Zaeem, “Modified embedded-atom method interatomic potentials for <span class="nocase">al-cu, al-fe and al-ni</span> binary alloys: From room temperature to melting point,” *Computational Materials Science*, vol. 201, p. 110 902, 2022, ISSN: 0927-0256. DOI: <https://doi.org/10.1016/j.commatsci.2021.110902>. [Online]. Available: <https://www.sciencedirect.com/science/article/pii/S0927025621006108>.
- [90] S. B. Maisel, W.-S. Ko, J. ( L. Zhang, B. Grabowski, and J. Neugebauer, *MEAM potential for v-ni-ti developed by maisel et al. (2017) v002*, 2023. DOI: [10.25950/73db5366](https://doi.org/10.25950/73db5366). [Online]. Available: <https://doi.org/10.25950/73db5366>.
- [91] S. B. Maisel, W.-S. Ko, J.-L. Zhang, B. Grabowski, and J. Neugebauer, “Thermomechanical response of NiTi shape-memory nanoprecipitates in TiV alloys,” *Physical Review Materials*, vol. 1, p. 033 610, Aug. 2017. DOI: [10.1103/PhysRevMaterials.1.033610](https://doi.org/10.1103/PhysRevMaterials.1.033610).
- [92] A. S. M. Miraz, N. Dhariwal, W. Meng, B. R. Ramachandran, and C. D. Wick, “Development and application of interatomic potentials to study the stability and shear strength of ti/TiN and cu/TiN interfaces,” *Materials & Design*, vol. 196, p. 109 123, 2020. DOI: [10.1016/j.matdes.2020.109123](https://doi.org/10.1016/j.matdes.2020.109123).
- [93] A. S. M. Miraz, N. Dhariwal, W. Meng, B. R. Ramachandran, and C. D. Wick, *MEAM potential for ti/TiN and cu/TiN interfaces developed by miraz et al. (2020) v002*, 2023. DOI: [10.25950/469db493](https://doi.org/10.25950/469db493). [Online]. Available: <https://doi.org/10.25950/469db493>.
- [94] M. Pascuet and J. Fernández, “Atomic interaction of the MEAM type for the study of intermetallics in the al–u alloy,” *Journal of Nuclear Materials*, vol. 467, pp. 229–239, 2015. DOI: [10.1016/j.jnucmat.2015.09.030](https://doi.org/10.1016/j.jnucmat.2015.09.030).
- [95] M. I. Pascuet and J. R. Fernández, *MEAM potential for al-u developed by pascuet and fernandez (2015) v002*, 2023. DOI: [10.25950/2a828eb9](https://doi.org/10.25950/2a828eb9). [Online]. Available: <https://doi.org/10.25950/2a828eb9>.
- [96] M. I. Pascuet and J. R. Fernández, *MEAM potential for al developed by pascuet and fernandez (2015) v002*, 2023. DOI: [10.25950/87d95ada](https://doi.org/10.25950/87d95ada). [Online]. Available: <https://doi.org/10.25950/87d95ada>.

- [97] S. Roy, A. Dutta, and N. Chakraborti, *MEAM potential for al and al-li alloys developed by roy, dutta, and chakraborti (2021) v001*, 2023. DOI: [10.25950/c64e2288](https://doi.org/10.25950/c64e2288). [Online]. Available: <https://doi.org/10.25950/c64e2288>.
- [98] S. Roy, A. Dutta, and N. Chakraborti, “A novel method of determining interatomic potential for al and al-li alloys and studying strength of al-al3li interphase using evolutionary algorithms,” *Computational Materials Science*, vol. 190, p. 110 258, 2021. DOI: [10.1016/j.commatsci.2020.110258](https://doi.org/10.1016/j.commatsci.2020.110258).
- [99] J.-H. Shim, W.-S. Ko, K.-H. Kim, *et al.*, *MEAM potential for the al-v-h system developed by shim et al. (2013) v002*, 2023. DOI: [10.25950/b47e7b28](https://doi.org/10.25950/b47e7b28). [Online]. Available: <https://doi.org/10.25950/b47e7b28>.
- [100] J.-H. Shim, W.-S. Ko, K.-H. Kim, *et al.*, *MEAM potential for the ni-v-h system developed by shim et al. (2013) v002*, 2023. DOI: [10.25950/5fb2eb4f](https://doi.org/10.25950/5fb2eb4f). [Online]. Available: <https://doi.org/10.25950/5fb2eb4f>.
- [101] J.-H. Shim, S. I. Park, Y. W. Cho, and B.-J. Lee, *MEAM potential for the ni-w system developed by shim et al. (2003) v002*, 2023. DOI: [10.25950/a82c6cb9](https://doi.org/10.25950/a82c6cb9). [Online]. Available: <https://doi.org/10.25950/a82c6cb9>.
- [102] J.-H. Shim, S. I. Park, Y. W. Cho, and B.-J. Lee, “Modified embedded-atom method calculation for the ni–w system,” *Journal of materials research*, vol. 18, no. 8, pp. 1863–1867, 2003, Publisher: Cambridge University Press. DOI: [10.1557/JMR.2003.0260](https://doi.org/10.1557/JMR.2003.0260).
- [103] J.-H. Shim, W.-S. Ko, K.-H. Kim, *et al.*, “Prediction of hydrogen permeability in v–al and v–ni alloys,” *Journal of membrane science*, vol. 430, pp. 234–241, 2013, Publisher: Elsevier. DOI: [10.1016/j.memsci.2012.12.019](https://doi.org/10.1016/j.memsci.2012.12.019).
- [104] S. Sun, B. R. Ramachandran, and C. D. Wick, *MEAM potential for TiAl alloys developed by sun et al. (2018) v002*, 2023. DOI: [10.25950/53f39e5b](https://doi.org/10.25950/53f39e5b). [Online]. Available: <https://doi.org/10.25950/53f39e5b>.
- [105] S. Sun, B. R. Ramachandran, and C. D. Wick, “Solid, liquid, and interfacial properties of TiAl alloys: Parameterization of a new modified embedded atom method model,” *Journal of Physics: Condensed Matter*, vol. 30, no. 7, p. 075 002, Jan. 2018. DOI: [10.1088/1361-648x/aaa52c](https://doi.org/10.1088/1361-648x/aaa52c).
- [106] E. B. Tadmor, R. S. Elliott, J. P. Sethna, R. E. Miller, and C. A. Becker, “The potential of atomistic simulations and the knowledgebase of interatomic models,” *JOM*, vol. 63, no. 7, pp. 17–17, Jul. 2011, ISSN: 1047-4838, 1543-1851. DOI: [10.1007/s11837-011-0102-6](https://doi.org/10.1007/s11837-011-0102-6). [Online]. Available: <http://link.springer.com/10.1007/s11837-011-0102-6> (visited on 04/28/2023).
- [107] G. J. Wagner, *MEAM potential for cu developed by wagner (2007) v002*, 2023. DOI: [10.25950/3ce34938](https://doi.org/10.25950/3ce34938). [Online]. Available: <https://doi.org/10.25950/3ce34938>.
- [108] G. J. Wagner, *MEAM potential for ni developed by wagner (2007) v002*, 2023. DOI: [10.25950/9a3f3af9](https://doi.org/10.25950/9a3f3af9). [Online]. Available: <https://doi.org/10.25950/9a3f3af9>.
- [109] J. Wang, S.-H. Oh, and B.-J. Lee, *MEAM potential for the cu-co system developed by wang et al. (2020) v002*, 2023. DOI: [10.25950/933c4dc4](https://doi.org/10.25950/933c4dc4). [Online]. Available: <https://doi.org/10.25950/933c4dc4>.

- [110] J. Wang, S.-H. Oh, and B.-J. Lee, *MEAM potential for the cu-co system developed by wang, oh, and lee (2020) v002*, 2023. DOI: [10.25950/68934ec6](https://doi.org/10.25950/68934ec6). [Online]. Available: <https://doi.org/10.25950/68934ec6>.
- [111] J. Wang, S.-H. Oh, and B.-J. Lee, *MEAM potential for the cu-mo system developed by wang et al. (2020) v002*, 2023. DOI: [10.25950/2f5cea4d](https://doi.org/10.25950/2f5cea4d). [Online]. Available: <https://doi.org/10.25950/2f5cea4d>.
- [112] J. Wang, S.-H. Oh, and B.-J. Lee, *MEAM potential for the cu-mo system developed by wang, oh, and lee (2020) v002*, 2023. DOI: [10.25950/879d79de](https://doi.org/10.25950/879d79de). [Online]. Available: <https://doi.org/10.25950/879d79de>.
- [113] J. Wang, S.-H. Oh, and B.-J. Lee, “Second nearest neighbor modified embedded atom method interatomic potential for cu-m (m co, mo) binary systems,” *Computational Materials Science*, vol. 178, p. 109 627, 2020, Publisher: Elsevier. DOI: [10.1016/j.commatsci.2020.109627](https://doi.org/10.1016/j.commatsci.2020.109627).
- [114] C. Wu, B.-J. Lee, and X. Su, *MEAM potential for the ni-cr system developed by wu, lee, and su (2017) v002*, 2023. DOI: [10.25950/cc682dca](https://doi.org/10.25950/cc682dca). [Online]. Available: <https://doi.org/10.25950/cc682dca>.
- [115] C. Wu, B.-J. Lee, and X. Su, *MEAM potential for the ni-cr-fe system developed by wu, lee, and su (2017) v002*, 2023. DOI: [10.25950/c32e4e35](https://doi.org/10.25950/c32e4e35). [Online]. Available: <https://doi.org/10.25950/c32e4e35>.
- [116] C. Wu, B.-J. Lee, and X. Su, *MEAM potential for the ni-fe system developed by wu, lee, and su (2017) v002*, 2023. DOI: [10.25950/83db34ec](https://doi.org/10.25950/83db34ec). [Online]. Available: <https://doi.org/10.25950/83db34ec>.
- [117] C. Wu, B.-J. Lee, and X. Su, “Modified embedded-atom interatomic potential for fe-ni, cr-ni and fe-cr-ni systems,” *CALPHAD ; computer coupling of phase diagrams and thermochemistry*, vol. 57, pp. 98–106, 2017, Publisher: Elsevier. DOI: [10.1016/j.calphad.2017.03.007](https://doi.org/10.1016/j.calphad.2017.03.007).
